# Supplementary material for: Mathematical Modeling and Validation of the Ergosterol Pathway in Saccharomyces cerevisiae
Source: PLoS One. 2011 Dec 14;6(12):e28344. doi: 10.1371/journal.pone.0028344 (PMC3237449; doi:10.1371/journal.pone.0028344)
Supplement: Materials S2 — Modifications of our former sphingolipid (SL) model. (DOC) [file pone.0028344.s021.doc]

***Materials S2*.-** *Modifications of our former sphingolipid (SL) model.*

The previous versions of the sphingolipid model [1-3] were modified as follows:

All recalculated kinetic orders (*a*-*d*) are close to the values presented in Alvarez-Vasquez *et al*. [2] and do not affect the previous model dynamics or conclusions, but can affect numerical values of model sensitivities; the corrections (*a*-*d*) are reflected in Tables S1 and S2.

The SL GMA kinetic orders for *v*1,2, *v*9,15, *v*10,56, *v*2,4, and *v*5,6 where recalculated as follows:

*a.*- *v*1,2 : Kishimoro *et al.* [4] present the KM of KDHS reductase for KDHS in M. For the kinetic order calculation, this value must first be converted to mol%. For this propose, we used a M-mol% relationship based on data in Lanterman & Saba, ([5], Fig 2) and Nagiec *et al*. ([6], Fig 2) as follows:

15 M × 0.38 mol%  7.7 M = 0.74 mol%

The kinetic order is then

*f*(1,2,127) = 0.74  (0.74 + 0.0053) = 0.993

This value is not very different from the published data of 0.999 [2].

*b.*- *v*10,156 : The KM of the PS decarboxylase for PS is 9.5 M [7].

Implementing the M-mol% relationship from above one obtains:

9.5 M × 0.38 mol% / 7.7 M = 0.468 mol%

However, this recalculated KM value led to instability in the SL-E model. Instead we used a KM similar at the substrate concentration something, which is justified by the fact that in many cases the Km is close to the cellular substrate concentration.

As commented by Cleland, the KM of the enzymes is often useful to develop an idea of the physiological substrate concentration because: “While it is not an independent constant, it is a very useful one for the biochemist, since it is also a clue to the physiological level of the substrate. (A substrate concentration around KM utilizes most of the catalytic potential of the enzyme, while still maintaining proportional control; at high substrate levels the rate does not vary with substrate concentration, and one has no control)” [8].

*f*(10,0,120) = 8.4  (8.4 + 8.4) = 0.5

*c.*- *v*9,15: The KM of the PI synthase for CDP-DAG is 66 M according to Kelley *et al*. [9] . Implementing the same M-mol% relationship from point *a* one obtains:

66 M × 0.38 mol%  7.7 M = 3.25 mol%

The kinetic order is then

*f*(9,15,126) = 0.976

which is not very different from the published data of 0.912 [2].

*d.*- *v*2,4 and *v*5,6: The kinetic orders value for *f*(2,4,28) and *f*(5,6,2) is 0.022, which was derived in Alvarez-Vasquez *et al*. [3]. It was obtained using a ATP concentration of 1100 M and a KM from the sphingoid base kinase for the ATP of 25 M.

**References**

1. Alvarez-Vasquez F, Hannun YA, Voit EO (2008) Dynamics of Positional Enrichment: Theoretical Development and Application to Carbon Labeling in Zymomonas mobilis. Biochem Eng J 40: 157-174.

2. Alvarez-Vasquez F, Sims KJ, Cowart LA, Okamoto Y, Voit EO, et al. (2005) Simulation and validation of modelled sphingolipid metabolism in Saccharomyces cerevisiae. Nature 433: 425-430.

3. Alvarez-Vasquez F, Sims KJ, Hannun YA, Voit EO (2004) Integration of kinetic information on yeast sphingolipid metabolism in dynamical pathway models. J Theor Biol 226: 265-291.

4. Kishimoto Y (1983) In: Boyer. PD, editor. The Enzymes. 3 ed. New York,: Academic Press. pp. Ch 10.

5. Lanterman MM, Saba JD (1998) Characterization of sphingosine kinase (SK) activity in Saccharomyces cerevisiae and isolation of SK-deficient mutants. Biochem J 332 ( Pt 2): 525-531.

6. Nagiec MM, Skrzypek M, Nagiec EE, Lester RL, Dickson RC (1998) The LCB4 (YOR171c) and LCB5 (YLR260w) genes of Saccharomyces encode sphingoid long chain base kinases. J Biol Chem 273: 19437-19442.

7. Trotter PJ, Voelker DR (1995) Identification of a non-mitochondrial phosphatidylserine decarboxylase activity (PSD2) in the yeast Saccharomyces cerevisiae. J Biol Chem 270: 6062-6070.

8. Cleland WW (1970) The Enzymes. 3 ed: Academic Press, Inc., New York and London. pp. 1-65.

9. Kelley MJ, Bailis AM, Henry SA, Carman GM (1988) Regulation of phospholipid biosynthesis in Saccharomyces cerevisiae by inositol. Inositol is an inhibitor of phosphatidylserine synthase activity. J Biol Chem 263: 18078-18085.
