# Supplementary material for: Mathematical Modeling and Validation of the Ergosterol Pathway in Saccharomyces cerevisiae
Source: PubMed Central journal article supplement (PMC3237449; doi:10.1371/journal.pone.0028344), 2011-12-14
Supplement: pone.0028344.s008.pdf [file pone.0028344.s008.pdf]

**Table S6. (cont...).**

|           | $X_{17}$ | $X_{18}$ | $X_{19}$ | $X_{20}$ | $X_{21}$ | $X_{22}$ | $X_{23}$ | $X_{24}$ | $X_{25}$ | $X_{26}$ | $X_{27}$ | $X_{28}$ | $X_{29}$ | $X_{30}$ | $X_{31}$ | $X_{32}$ |
|-----------|----------|----------|----------|----------|----------|----------|----------|----------|----------|----------|----------|----------|----------|----------|----------|----------|
| $X_{122}$ | -4.81    | ---      | ---      | ---      | ---      | ---      | 2.97     | ---      | 13.15    | 2.00     | 2.00     | 4.00     | 3.35     | 3.02     | 3.59     | 4.00     |
| $X_{123}$ | -2.83    | ---      | ---      | ---      | ---      | ---      | 1.75     | ---      | 7.72     | 1.18     | 1.18     | 2.35     | 1.97     | 1.77     | 2.11     | 2.35     |
| $X_{124}$ | -5.44    | ---      | ---      | ---      | ---      | ---      | 3.36     | ---      | 14.88    | 2.27     | 2.27     | 4.52     | 3.79     | 3.42     | 4.06     | 4.52     |
| $X_{125}$ | ---      | ---      | ---      | ---      | ---      | ---      | ---      | ---      | 2.27     | ---      | ---      | ---      | ---      | ---      | ---      | ---      |
| $X_{128}$ | -3.55    | ---      | ---      | ---      | ---      | ---      | 2.21     | ---      | ---      | ---      | ---      | ---      | ---      | ---      | ---      | ---      |
| $X_{130}$ | ---      | 1.54     | ---      | ---      | ---      | ---      | ---      | ---      | ---      | ---      | ---      | ---      | ---      | ---      | ---      | ---      |
| $X_{132}$ | -7.05    | -2.22    | -1.01    | -1.56    | -1.05    | ---      | 3.53     | -2.19    | 5.71     | ---      | ---      | 1.74     | 1.45     | 1.31     | 1.56     | 1.74     |
| $X_{133}$ | ---      | 1.33     | ---      | ---      | ---      | ---      | ---      | ---      | ---      | ---      | ---      | ---      | ---      | ---      | ---      | ---      |
| $X_{134}$ | -2.86    | ---      | ---      | ---      | ---      | ---      | ---      | ---      | ---      | ---      | ---      | ---      | ---      | ---      | ---      | ---      |
| $X_{135}$ | ---      | ---      | ---      | -1.29    | ---      | ---      | ---      | ---      | ---      | ---      | ---      | ---      | ---      | ---      | ---      | ---      |
| $X_{136}$ | 1.56     | ---      | ---      | ---      | ---      | ---      | ---      | ---      | ---      | ---      | ---      | ---      | ---      | ---      | ---      | ---      |
| $X_{142}$ | 1.10     | ---      | ---      | ---      | ---      | ---      | ---      | ---      | ---      | ---      | ---      | ---      | ---      | ---      | ---      | ---      |
| $X_{143}$ | ---      | -1.52    | ---      | ---      | ---      | ---      | ---      | ---      | ---      | ---      | ---      | ---      | ---      | ---      | ---      | ---      |
| $X_{144}$ | ---      | ---      | -1.94    | -2.04    | ---      | -1.05    | ---      | ---      | ---      | ---      | ---      | ---      | ---      | ---      | ---      | ---      |
| $X_{145}$ | -2.00    | ---      | ---      | ---      | ---      | ---      | ---      | ---      | ---      | ---      | ---      | ---      | ---      | ---      | ---      | ---      |
| $X_{146}$ | ---      | ---      | 2.16     | 2.32     | ---      | 1.07     | ---      | ---      | ---      | ---      | ---      | ---      | ---      | ---      | ---      | ---      |
| $X_{147}$ | ---      | ---      | 1.08     | 1.16     | ---      | ---      | ---      | ---      | ---      | ---      | ---      | ---      | ---      | ---      | ---      | ---      |
| $X_{148}$ | ---      | -1.56    | ---      | ---      | ---      | ---      | ---      | ---      | ---      | ---      | ---      | ---      | ---      | ---      | ---      | ---      |
| $X_{149}$ | -2.84    | ---      | ---      | ---      | ---      | ---      | ---      | ---      | 1.20     | ---      | ---      | ---      | ---      | ---      | ---      | ---      |
| $X_{152}$ | 14.79    | ---      | ---      | ---      | ---      | ---      | -9.15    | ---      | -15.99   | -2.44    | -2.44    | -4.86    | -4.07    | -3.67    | -4.36    | -4.86    |
| $X_{154}$ | 1.86     | -1.23    | ---      | ---      | ---      | ---      | ---      | ---      | ---      | ---      | ---      | ---      | ---      | ---      | ---      | ---      |
| $X_{155}$ | ---      | -1.04    | ---      | ---      | ---      | ---      | ---      | ---      | ---      | ---      | ---      | ---      | ---      | ---      | ---      | ---      |
| $X_{157}$ | 7.12     | 2.24     | 1.02     | 1.57     | 1.06     | ---      | -3.56    | 2.21     | -5.76    | ---      | ---      | -1.75    | -1.47    | -1.32    | -1.57    | -1.75    |
| $X_{158}$ | ---      | 1.53     | ---      | ---      | ---      | ---      | ---      | ---      | ---      | ---      | ---      | ---      | ---      | ---      | ---      | ---      |
| $X_{159}$ | -4.69    | ---      | ---      | ---      | ---      | ---      | 2.90     | -2.26    | 5.07     | ---      | ---      | 1.54     | 1.29     | 1.16     | 1.38     | 1.54     |
| $X_{160}$ | -9.55    | ---      | ---      | ---      | ---      | ---      | 5.90     | ---      | ---      | ---      | ---      | ---      | ---      | ---      | ---      | ---      |
| $X_{165}$ | 7.40     | 2.33     | 1.06     | 1.64     | 1.11     | ---      | -3.70    | 2.30     | -5.99    | ---      | ---      | -1.82    | -1.53    | -1.38    | -1.64    | -1.82    |
| $X_{171}$ | 1.02     | ---      | ---      | ---      | ---      | ---      | ---      | ---      | -2.78    | ---      | ---      | ---      | ---      | ---      | ---      | ---      |
| $X_{172}$ | ---      | ---      | ---      | ---      | ---      | ---      | ---      | ---      | ---      | -1.00    | ---      | ---      | ---      | ---      | ---      | ---      |
| $X_{173}$ | ---      | ---      | ---      | ---      | ---      | ---      | ---      | ---      | ---      | ---      | -1.00    | ---      | ---      | ---      | ---      | ---      |
| $X_{174}$ | ---      | ---      | ---      | ---      | ---      | ---      | ---      | ---      | 1.09     | ---      | ---      | -1.28    | ---      | ---      | ---      | ---      |
| $X_{175}$ | ---      | ---      | ---      | ---      | ---      | ---      | ---      | ---      | ---      | ---      | ---      | ---      | -1.68    | ---      | ---      | ---      |
| $X_{176}$ | ---      | ---      | ---      | ---      | ---      | ---      | ---      | ---      | ---      | ---      | ---      | ---      | ---      | -1.51    | ---      | ---      |
| $X_{177}$ | ---      | ---      | ---      | ---      | ---      | ---      | ---      | ---      | ---      | ---      | ---      | ---      | ---      | ---      | -1.80    | ---      |
| $X_{179}$ | ---      | ---      | ---      | ---      | ---      | ---      | ---      | ---      | -1.09    | ---      | ---      | ---      | ---      | ---      | ---      | ---      |
| $X_{186}$ | 1.02     | ---      | ---      | ---      | ---      | ---      | ---      | ---      | -2.78    | ---      | ---      | ---      | ---      | ---      | ---      | -1.84    |

**Table S6. (cont...).**

|                        | <b>X<sub>33</sub></b> | <b>X<sub>34</sub></b> | <b>X<sub>35</sub></b> | <b>X<sub>36</sub></b> | <b>X<sub>37</sub></b> | <b>X<sub>38</sub></b> | <b>X<sub>39</sub></b> | <b>X<sub>40</sub></b> |
|------------------------|-----------------------|-----------------------|-----------------------|-----------------------|-----------------------|-----------------------|-----------------------|-----------------------|
| <b>X<sub>122</sub></b> | 6.53                  | 7.75                  | 8.63                  | 4.02                  | 4.61                  | 13.62                 | 4.01                  | 17.26                 |
| <b>X<sub>123</sub></b> | 3.84                  | 4.55                  | 5.07                  | 2.36                  | 2.71                  | ---                   | 2.35                  | 10.14                 |
| <b>X<sub>124</sub></b> | 7.39                  | 8.77                  | 9.77                  | 4.55                  | 5.22                  | 9.49                  | 4.54                  | 19.53                 |
| <b>X<sub>125</sub></b> | 1.12                  | 1.34                  | 1.49                  | ---                   | ---                   | 2.35                  | ---                   | 2.97                  |
| <b>X<sub>128</sub></b> | ---                   | ---                   | ---                   | ---                   | ---                   | -7.91                 | ---                   | ---                   |
| <b>X<sub>130</sub></b> | 2.29                  | 2.34                  | 2.38                  | ---                   | 1.12                  | 1.37                  | ---                   | 4.75                  |
| <b>X<sub>132</sub></b> | 2.81                  | 3.34                  | 3.73                  | 1.70                  | ---                   | ---                   | 1.72                  | 7.45                  |
| <b>X<sub>148</sub></b> | -2.33                 | -2.38                 | -2.41                 | ---                   | -1.13                 | -1.39                 | ---                   | -4.83                 |
| <b>X<sub>152</sub></b> | -7.66                 | -9.15                 | -10.21                | -4.89                 | -5.79                 | ---                   | -4.88                 | -20.43                |
| <b>X<sub>157</sub></b> | -2.84                 | -3.38                 | -3.76                 | -1.71                 | ---                   | ---                   | -1.73                 | -7.52                 |
| <b>X<sub>158</sub></b> | 2.28                  | 2.33                  | 2.37                  | ---                   | 1.11                  | 1.37                  | ---                   | 4.74                  |
| <b>X<sub>159</sub></b> | 2.43                  | 2.90                  | 3.24                  | 1.55                  | 1.84                  | ---                   | 1.55                  | 6.48                  |
| <b>X<sub>161</sub></b> | ---                   | ---                   | ---                   | ---                   | ---                   | -12.65                | ---                   | ---                   |
| <b>X<sub>163</sub></b> | ---                   | ---                   | ---                   | ---                   | ---                   | -15.84                | ---                   | ---                   |
| <b>X<sub>165</sub></b> | -2.95                 | -3.51                 | -3.91                 | -1.78                 | ---                   | ---                   | -1.80                 | -7.82                 |
| <b>X<sub>174</sub></b> | 1.18                  | 1.40                  | 1.56                  | ---                   | ---                   | ---                   | ---                   | 3.11                  |
| <b>X<sub>176</sub></b> | -3.24                 | ---                   | ---                   | ---                   | ---                   | ---                   | ---                   | ---                   |
| <b>X<sub>177</sub></b> | ---                   | -3.86                 | ---                   | ---                   | ---                   | ---                   | ---                   | ---                   |
| <b>X<sub>179</sub></b> | -1.18                 | -1.40                 | -1.56                 | ---                   | ---                   | ---                   | ---                   | -3.11                 |
| <b>X<sub>180</sub></b> | -2.60                 | -2.60                 | -2.60                 | ---                   | ---                   | ---                   | ---                   | -5.19                 |
| <b>X<sub>181</sub></b> | 2.60                  | 2.60                  | ---                   | ---                   | ---                   | ---                   | ---                   | ---                   |
| <b>X<sub>183</sub></b> | ---                   | ---                   | 2.60                  | ---                   | ---                   | ---                   | ---                   | 5.19                  |
| <b>X<sub>186</sub></b> | ---                   | ---                   | -3.97                 | -1.85                 | -2.08                 | ---                   | -1.85                 | -7.94                 |
