# Supplementary material for: REPRESENTASI HAK PEREMPUAN DI TUJUH MEDIA CETAK JAWA TENGAH
Source: PLOS journal article supplement (doi:10.1371/journal.pone.0028344), 2010-10-01
Supplement: S3 (10.1371/journal.pone.0028344.s003) [file journal.pone.0028344.s003]

**Table S1.** Condensed literature information for the SL-E metabolites.

| Metabolite                          | Symbol in Model | Concentration (*)               | Comments                                                                                                                    | References           |
|-------------------------------------|-----------------|---------------------------------|-----------------------------------------------------------------------------------------------------------------------------|----------------------|
| 3-Keto-Dihydrosphingosine (KDHS)    | $X_1$           | 0.0053 mol%                     | Low level expected because it is difficult to measure levels for this metabolite by thin layer chromatography               | [1], ([2], p. 30693) |
| Dihydrosphingosine (DHS)            | $X_2$           | <b>0.01 mol%</b> <sup>(Φ)</sup> | Ten times the DHS-P concentration ([3]). Data obtained according to the procedures for mass and species measurements in [4] | [4]                  |
|                                     |                 | 0.53 mol%                       | Exponential growth phase ( $1 \times 10^7$ cells/ml)                                                                        | ([5], Table II)      |
| Dihydroceramide (Dihydro-C)         | $X_3$           | <b>0.036 mol%</b>               |                                                                                                                             | [6]                  |
|                                     |                 | 0.16 mol%                       | Lag phase                                                                                                                   | [7]                  |
| Dihydrosphingosine -1P (DHS-P)      | $X_4$           | <b>0.001 mol%</b>               |                                                                                                                             | ([8], Fig. 3C)       |
|                                     |                 | 0.00278 mol%                    | Single measure for both S-1-P species                                                                                       | ([9], Table 2)       |
| Phytosphingosine (PHS)              | $X_5$           | <b>0.05 mol%</b>                | Ten times the PHS-P concentration ([3]). Data obtained according to the procedures for mass and species measurements in [4] | [4]                  |
|                                     |                 | 0.16 mol%                       | Exponential growth phase ( $1 \times 10^7$ cells/ml)                                                                        | ([5], Table II)      |
| Phytosphingosine-1P (PHS-P)         | $X_6$           | <b>0.005 mol%</b>               |                                                                                                                             | ([8], Fig.3C)        |
|                                     |                 | 0.00278 mol%                    | Single measurement for both S-1-P species                                                                                   | ([9], Table 2)       |
| Phytoceramide (Phyto-C)             | $X_7$           | <b>0.052 mol%</b>               |                                                                                                                             | [6]                  |
|                                     |                 | 0.086 mol%                      | Lag phase                                                                                                                   | [7]                  |
|                                     |                 | 4.5 mol%                        | $2.5 A_{600}$ that correspond to $2.5-5 \times 10^7$ cells                                                                  | ([10], Fig 8B)       |
| Inositol Phosphorylceramide (IPC-g) | $X_8$           | <b>0.102 mol%</b>               | Value from [11] at 30°C and $2 \times 10^7$ cells/ml. Estimated as 10% of the non-plasma membrane concentration             | ([11], Fig 7A)       |
|                                     |                 | 8.4 mol%                        | Sum of IPC/C and IPC/D at 24°C                                                                                              | ([10], Fig 8B)       |

|                                                                  |          |                               |                                                                                                                       |                       |
|------------------------------------------------------------------|----------|-------------------------------|-----------------------------------------------------------------------------------------------------------------------|-----------------------|
| CDP- Diacylglycerol (CDP-DAG)                                    | $X_9$    | 5.4 mol%                      | Complete synthetic medium                                                                                             | ([12], Table III)     |
| Phosphatidylserine (PS)                                          | $X_{10}$ | <b>8.4 mol%</b>               | Microsomes                                                                                                            | ([13], Table 2)       |
|                                                                  |          | 9.8 mol%                      | Complete synthetic medium                                                                                             | ([12], Table III)     |
| Phosphatidic Acid (PA)                                           | $X_{11}$ | <b>3 mol%</b>                 | Microsomes                                                                                                            | ([13], Table 2)       |
|                                                                  |          | 3.3 mol%                      | Harvested in the Late log phase                                                                                       | ([14], Table 3)       |
|                                                                  |          | 3.1 mol%                      | Complete synthetic medium                                                                                             | ([12], Table III)     |
| Palmitoyl-CoA (Pal-CoA)                                          | $X_{12}$ | <b>0.01 <math>\mu</math>M</b> | Low level for free long-chain acyl-CoA esters                                                                         | ([15], p. 100)        |
| Serine                                                           | $X_{13}$ | <b>2600 <math>\mu</math>M</b> |                                                                                                                       | [12]                  |
|                                                                  |          | 2720 $\mu$ M                  | Rabbit liver                                                                                                          | ([16], Table 1)       |
| <i>sn</i> -1,2-Diacylglycerol (DAG)                              | $X_{14}$ | <b>10.7 mol%</b>              | Late exponential phase for DAG and for phospholipid concentrations                                                    | ([17], Fig. 1)        |
|                                                                  |          | 0.47 mol%                     | Rat kidney                                                                                                            | [18]                  |
| Phosphatidylinositol (PI)                                        | $X_{15}$ | <b>16.7 mol%</b>              | Microsomes                                                                                                            | ([13], Table 2)       |
|                                                                  |          | 4.61 mol%                     | Exponential growth phase ( $2 \times 10^7$ cells/ml)                                                                  | ([11], Fig. 8)        |
|                                                                  |          | 7.5 mol%                      | Complete synthetic medium                                                                                             | ([12], Table III)     |
| Inositol (I)                                                     | $X_{16}$ | <b>24.1 <math>\mu</math>M</b> | Cytosolic concentration                                                                                               | ([12], , Table V)     |
| Cytidine diphosphate-Ethanolamine (CDP-Eth)                      | $X_{17}$ | 22 $\mu$ M                    | Estimated using the $K_M$ of DG-Ethanolamine phosphotransferase for CDP-Eth                                           |                       |
| Mannosylinositol Phosphorylceramide (MIPC-g)                     | $X_{18}$ | 0.14 mol%                     | Value from [11] at 30°C and $2 \times 10^7$ cells/ml. Estimate 10% non-plasma membrane concentration                  | ([11] Fig. 7A)        |
| Mannosyldiinositol Phosphorylceramide ( M(IP) <sub>2</sub> C-g ) | $X_{19}$ | <b>0.0085 mol%</b>            | Value from [11] at 30°C and $2 \times 10^7$ cells/ml. Estimate 10% non-plasma membrane concentration                  | ([11], Fig. 7A)       |
|                                                                  |          | 4.2 mol%                      | At 24°C, not all the species measured                                                                                 | ([10], Fig.8B)        |
| Plasma Membrane Inositol Phosphorylceramide (IPC-m)              | $X_{20}$ | 0.918 mol%                    | Value from [11] at 30°C and $2 \times 10^7$ cells/ml. Estimated as 90% of the plasma membrane concentration from [19] | ([11], Fig. 7A), [19] |
| Plasma Membrane Mannosylinositol Phosphorylceramide (MIPC-m)     | $X_{21}$ | 1.26 mol%                     | Value from [11] at 30°C and $2 \times 10^7$ cells/ml. Estimated as 90% of the plasma membrane concentration from [19] | ([11], Fig. 7A), [19] |

|                                                                                |          |                                                             |                                                                                                                                                        |                                      |
|--------------------------------------------------------------------------------|----------|-------------------------------------------------------------|--------------------------------------------------------------------------------------------------------------------------------------------------------|--------------------------------------|
| Plasma Membrane Mannosyl-dinositol Phosphorylceramide (M(IP) <sub>2</sub> C-m) | $X_{22}$ | 0.0765 mol%                                                 | Value from [11] at 30°C and $2 \times 10^7$ cells/ml. Estimated as 90% of the plasma membrane concentration from [19]                                  | ([11], Fig. 7A), [19]                |
| Very Long Chain Fatty Acid (C <sub>26</sub> -CoA)                              | $X_{23}$ | 0.5 mol%                                                    |                                                                                                                                                        | ([20], Fig. 2B)                      |
| Malonyl-CoA (Mal-CoA)                                                          | $X_{24}$ | <b>182.7 <math>\mu</math>M</b>                              | Ac-CoA multiplied by the relationship between rat liver Mal-CoA and. Ac-CoA, which is 14.5/68.5 according to [21]                                      | [21]                                 |
|                                                                                |          | 7.73 mol%                                                   | Concentration with respect to long and very long species C <sub>22:0</sub> , C <sub>24:0</sub> and, C <sub>26:0</sub>                                  | ([22], Table VI)                     |
|                                                                                |          | 1740 $\mu$ M                                                | 1:2 Acetyl-CoA: Malonyl-CoA <i>in vitro</i> relationship                                                                                               | [23]                                 |
| Acetyl-CoA (Ac-CoA)                                                            | $X_{25}$ | 870 $\mu$ M                                                 | Table 2 reported 2.5 mM/gr dw. Converted to $\mu$ M using $RS^d Y_{sx}$ from Table 4 and “O” from Fig 2                                                | ([24], Tables 2 & 4), ([25], Fig. 2) |
| 3-hydroxy-3-methylglutaryl-coenzyme A (HMG-CoA)                                | $X_{26}$ | 0.1 $\mu$ M                                                 | Below detection limit during growth in glucose medium in [26]                                                                                          | [26]                                 |
| Mevalonate                                                                     | $X_{27}$ | 0.1 $\mu$ M                                                 | Low level; estimated                                                                                                                                   | N/A                                  |
| Farnesyl-PP                                                                    | $X_{28}$ | 0.1 $\mu$ M                                                 | Low level; estimated. No large changes were found under different experimental conditions in [27] for mouse and rat                                    | [27]                                 |
| Squalene                                                                       | $X_{29}$ | 0.283 % total sterols                                       | Wild-type Ergosterol / Squalene relationship was expressed as : ER ergosterol $\times$ 0.05 % (w/w) / 1.67 % (w/w) = $23.7 \times 0.05 / 1.67 = 0.712$ | ([28], Fig. 2)                       |
| Lanosterol                                                                     | $X_{30}$ | <b>1.9 % total sterols</b> <sup>(<math>\Omega</math>)</sup> | M30 microsomal fraction                                                                                                                                | ([29], Table 3)                      |
|                                                                                |          | 4.0 % total sterols                                         |                                                                                                                                                        | ([30], Table 2)                      |
|                                                                                |          | 3.8 % total sterols                                         |                                                                                                                                                        | [31]                                 |
| Zymosterol                                                                     | $X_{31}$ | <b>6.4 % total sterols</b>                                  | M30 microsomal fraction                                                                                                                                | ([29], Table 3)                      |
|                                                                                |          | 12 % total sterols                                          |                                                                                                                                                        | ([30], Table 2)                      |
| Ergosterol-ER                                                                  | $X_{32}$ | <b>9.51 % total sterols</b>                                 | PM Ergosterol from [29]; average relationship of 10:1 between the PM and ER from [32] $95.1 / 10 = 9.51$                                               | ([29], Table 3), ([32], Fig. 4)      |
|                                                                                |          | 60.2 % total sterols                                        |                                                                                                                                                        | ([29], Table 3)                      |
|                                                                                |          | 43 % total sterols                                          |                                                                                                                                                        | ([30], Table 2)                      |
|                                                                                |          | 77 % total sterols                                          |                                                                                                                                                        | [31]                                 |

|                                                   |           |                                      |                                                                                                                                                                                                                                        |                                 |
|---------------------------------------------------|-----------|--------------------------------------|----------------------------------------------------------------------------------------------------------------------------------------------------------------------------------------------------------------------------------------|---------------------------------|
| Steryl Lanosterol                                 | $X_{33}$  | 3.4 % total sterols                  |                                                                                                                                                                                                                                        | ([29], Table 3)                 |
| Steryl Zymosterol                                 | $X_{34}$  | 13.1 % total sterols                 |                                                                                                                                                                                                                                        | ([29], Table 3)                 |
| Steryl Ergosterol-1                               | $X_{35}$  | 41.13 % total sterols                | Assumed as the biggest sub-population with 90% of the total Steryl Ergosterol pool, this yields $45.7 \times 0.9 = 41.13$ % total sterols                                                                                              | ([29], Table 3)                 |
| Outer PM Ergosterol                               | $X_{36}$  | 4.755 % total sterols                | PM Ergosterol from [29]. multiplied by the PM ergosterol non-DIG associated relationship from [32]. The value is split in half representing the PM outer ergosterol concentration $95.1 \times 0.1 \times 0.5 = 4.755$ % total sterols | ([29], Table 3), ([32], Fig. 4) |
| Outer PM Ergosterol DIM associated (Ergosterol-r) | $X_{37}$  | 42.795 % total sterols               | PM Ergosterol from [29]. multiplied by the PM ergosterol DIG associated relationship from [32]. The value is split in half representing the PM outer ergosterol concentration: $95.1 \times 0.9 \times 0.5 = 42.795$ % total sterols   | ([29], Table 3), ([32], Fig. 4) |
| Internal Acetate (Acetate Int.)                   | $X_{38}$  | 3086 $\mu\text{M}$                   | Value at 5 hrs during respiro-fermentative phase                                                                                                                                                                                       | ([33], Fig. 2C)                 |
| Inner PM Ergosterol (Ergosterol-i)                | $X_{39}$  | 47.55 % total sterols                | PM Ergosterol from [29]. multiplied by 0.5 representing the PM outer ergosterol concentration: $95.1 \times 0.5 = 47.55$ % total sterols                                                                                               | ([29], Table 3), ([32], Fig. 4) |
| Steryl Ergosterol-2                               | $X_{40}$  | 4.57 % total sterols                 | Assumed as the smallest sub-population with 10% of the total Steryl Ergosterol pool, this yields $45.7 \times 0.1 = 4.57$ % total sterols                                                                                              | ([29], Table 3)                 |
| Pyruvate                                          | $X_{124}$ | 227 $\mu\text{M}$                    |                                                                                                                                                                                                                                        | ([34], Fig. 2)                  |
| External Acetate (Acetate Ext)                    | $X_{125}$ | <b>1250 <math>\mu\text{M}</math></b> | Assumed as the rich broth medium acetate concentration used in Taylor and Parks [35]                                                                                                                                                   | ([33], Fig. 2C)                 |
|                                                   |           | 0.01 $\mu\text{M}$                   | Calculated based on a low external acetate concentration of 1 $\mu\text{M}$ under aerobic exponential growth conditions: acetate pK of 4.75, internal pH of 6.75 and external pH of 4                                                  | ([36], Fig. 6 & Eq. 1)          |
| Adenosine-5'-Triphosphate (ATP)                   | $X_{128}$ | <b>1100 <math>\mu\text{M}</math></b> |                                                                                                                                                                                                                                        | ([37], Table II)                |
|                                                   |           | 850 $\mu\text{M}$                    | Permeabilized yeast cells                                                                                                                                                                                                              | ([38], Fig. 4)                  |
| 3-Phosphoserine (3-P-Serine)                      | $X_{137}$ | <b>446 <math>\mu\text{M}</math></b>  | Rabbit liver                                                                                                                                                                                                                           | ([16], Table 1)                 |
| Glucose-6-P (G6P)                                 | $X_{147}$ | <b>1176 <math>\mu\text{M}</math></b> | Exponential growth                                                                                                                                                                                                                     | ([34], Fig. 2)                  |
|                                                   |           | 1000 $\mu\text{M}$                   | Permeabilized cells                                                                                                                                                                                                                    | ([38], Fig. 4)                  |
| Palmitate                                         | $X_{158}$ | <b>0.05 <math>\mu\text{M}</math></b> | Estimate                                                                                                                                                                                                                               |                                 |
| CoA                                               | $X_{161}$ | <b>60 <math>\mu\text{M}</math></b>   | Physiological level in rat liver                                                                                                                                                                                                       | [39]                            |
|                                                   |           | 100 $\mu\text{M}$                    | <i>Dictyostelium discoideum</i>                                                                                                                                                                                                        | [40]                            |
| Serine Ext.                                       | $X_{166}$ | <b>4000 <math>\mu\text{M}</math></b> |                                                                                                                                                                                                                                        | [3]                             |

(Φ) Where the literature reports more than one value reported for the same parameter, the value in bold type is used in the model.

(\*) mol% = concentration of sphingoid base or phosphatidate / concentration of total phospholipid.

(†) U/mg =  $\mu\text{mol}/\text{min}/\text{mg}$ .

(Ω) Percent with respect the total sterol amount for the *S. cerevisiae* wild type strain.

### A.3.- References.

1. Hannun Y: Unpublished data.
2. Beeler T, Bacikova D, Gable K, Hopkins L, Johnson C, et al. (1998) The *Saccharomyces cerevisiae* TSC10/YBR265w gene encoding 3-ketosphinganine reductase is identified in a screen for temperature-sensitive suppressors of the Ca<sup>2+</sup>-sensitive csg2Delta mutant. *J Biol Chem* 273: 30688-30694.
3. Cowart LA (2010): Personal communication.
4. Jenkins GM, Cowart LA, Signorelli P, Pettus BJ, Chalfant CE, et al. (2002) Acute activation of de novo sphingolipid biosynthesis upon heat shock causes an accumulation of ceramide and subsequent dephosphorylation of SR proteins. *J Biol Chem* 277: 42572-42578.
5. Wu WI, Lin YP, Wang E, Merrill AH, Jr., Carman GM (1993) Regulation of phosphatidate phosphatase activity from the yeast *Saccharomyces cerevisiae* by sphingoid bases. *J Biol Chem* 268: 13830-13837.
6. Mao C Personal communication. pp. Yeast cell labeled with <sup>3</sup>H-palmitic acid for 30 or 60 minutes. After labeling, total sphingolipids were extracted and analyzed by TLC, which was autoradiographed. The autoradiography image was scanned and lipids were quantitated by an ImageQuant software.
7. Okamoto Y Personal communication.
8. Skrzypek MS, Nagiec MM, Lester RL, Dickson RC (1999) Analysis of phosphorylated sphingolipid long-chain bases reveals potential roles in heat stress and growth control in *Saccharomyces*. *J Bacteriol* 181: 1134-1140.
9. Lanterman MM, Saba JD (1998) Characterization of sphingosine kinase (SK) activity in *Saccharomyces cerevisiae* and isolation of SK-deficient mutants. *Biochem J* 332 ( Pt 2): 525-531.
10. Reggiori F, Conzelmann A (1998) Biosynthesis of inositol phosphoceramides and remodeling of glycosylphosphatidylinositol anchors in *Saccharomyces cerevisiae* are mediated by different enzymes. *J Biol Chem* 273: 30550-30559.
11. Wu WI, McDonough VM, Nickels JT, Jr., Ko J, Fischl AS, et al. (1995) Regulation of lipid biosynthesis in *Saccharomyces cerevisiae* by fumonisin B1. *J Biol Chem* 270: 13171-13178.
12. Kelley MJ, Bailis AM, Henry SA, Carman GM (1988) Regulation of phospholipid biosynthesis in *Saccharomyces cerevisiae* by inositol. Inositol is an inhibitor of phosphatidylserine synthase activity. *J Biol Chem* 263: 18078-18085.
13. Pichler H, Gaigg B, Hrastnik C, Achleitner G, Kohlwein SD, et al. (2001) A subfraction of the yeast endoplasmic reticulum associates with the plasma membrane and has a high capacity to synthesize lipids. *Eur J Biochem* 268: 2351-2361.
14. Summers EF, Letts VA, McGraw P, Henry SA (1988) *Saccharomyces cerevisiae* cho2 mutants are deficient in phospholipid methylation and cross-pathway regulation of inositol synthesis. *Genetics* 120: 909-922.
15. Knudsen J, Jensen MV, Hansen JK, Faergeman NJ, Neergaard TB, et al. (1999) Role of acylCoA binding protein in acylCoA transport, metabolism and cell signaling. *Mol Cell Biochem* 192: 95-103.
16. Snell K, Fell DA (1990) Metabolic control analysis of mammalian serine metabolism. *Adv Enzyme Regul* 30: 13-32.
17. Taylor FR, Parks LW (1979) Triacylglycerol metabolism in *Saccharomyces cerevisiae*. Relation to phospholipid synthesis. *Biochim Biophys Acta* 575: 204-214.
18. Preiss J, Loomis CR, Bishop WR, Stein R, Nidel JE, et al. (1986) Quantitative measurement of sn-1,2-diacylglycerols present in platelets, hepatocytes, and ras- and sis-transformed normal rat kidney cells. *J Biol Chem* 261: 8597-8600.

19. Patton JL, Lester RL (1991) The phosphoinositol sphingolipids of *Saccharomyces cerevisiae* are highly localized in the plasma membrane. *J Bacteriol* 173: 3101-3108.
20. Gaigg B, Neergaard TB, Schneider R, Hansen JK, Faergeman NJ, et al. (2001) Depletion of acyl-coenzyme A-binding protein affects sphingolipid synthesis and causes vesicle accumulation and membrane defects in *Saccharomyces cerevisiae*. *Mol Biol Cell* 12: 1147-1160.
21. Guynn RW, Veloso D, Veech RL (1972) The concentration of malonyl-coenzyme A and the control of fatty acid synthesis in vivo. *J Biol Chem* 247: 7325-7331.
22. Choi JY, Martin CE (1999) The *Saccharomyces cerevisiae* FAT1 gene encodes an acyl-CoA synthetase that is required for maintenance of very long chain fatty acid levels. *J Biol Chem* 274: 4671-4683.
23. Sumper M, Oesterhelt D, Riepertinger C, Lynen F (1969) [Synthesis of various carboxylic acids by the fatty acid synthetase multienzyme complex of yeast and the explanation for their structure]. *Eur J Biochem* 10: 377-387.
24. Gombert AK, Moreira dos Santos M, Christensen B, Nielsen J (2001) Network identification and flux quantification in the central metabolism of *Saccharomyces cerevisiae* under different conditions of glucose repression. *J Bacteriol* 183: 1441-1451.
25. Ertugay N, Hamamci H, Bayindirli A (1997) Fed-batch cultivation of bakers' yeast: effect of nutrient depletion and heat stress on cell composition. *Folia Microbiol (Praha)* 42: 214-218.
26. Seker T, Moller K, Nielsen J (2005) Analysis of acyl CoA ester intermediates of the mevalonate pathway in *Saccharomyces cerevisiae*. *Appl Microbiol Biotechnol* 67: 119-124.
27. Bruenger E, Rilling HC (1988) Determination of isopentenyl diphosphate and farnesyl diphosphate in tissue samples with a comment on secondary regulation of polyisoprenoid biosynthesis. *Anal Biochem* 173: 321-327.
28. Polakowski T, Stahl U, Lang C (1998) Overexpression of a cytosolic hydroxymethylglutaryl-CoA reductase leads to squalene accumulation in yeast. *Appl Microbiol Biotechnol* 49: 66-71.
29. Ott RG, Athenstaedt K, Hrastnik C, Leitner E, Bergler H, et al. (2005) Flux of sterol intermediates in a yeast strain deleted of the lanosterol C-14 demethylase Erg11p. *Biochim Biophys Acta* 1735: 111-118.
30. Marcireau C, Guilloton M, Karst F (1990) In vivo effects of fenpropimorph on the yeast *Saccharomyces cerevisiae* and determination of the molecular basis of the antifungal property. *Antimicrob Agents Chemother* 34: 989-993.
31. Heese-Peck A, Pichler H, Zanolari B, Watanabe R, Daum G, et al. (2002) Multiple functions of sterols in yeast endocytosis. *Mol Biol Cell* 13: 2664-2680.
32. Baumann NA, Sullivan DP, Ohvo-Rekila H, Simonot C, Pottekat A, et al. (2005) Transport of newly synthesized sterol to the sterol-enriched plasma membrane occurs via nonvesicular equilibration. *Biochemistry* 44: 5816-5826.
33. Xu Z, Tsurugi K (2006) A potential mechanism of energy-metabolism oscillation in an aerobic chemostat culture of the yeast *Saccharomyces cerevisiae*. *Febs J* 273: 1696-1709.
34. Lagunas R, Dominguez C, Busturia A, Saez MJ (1982) Mechanisms of appearance of the Pasteur effect in *Saccharomyces cerevisiae*: inactivation of sugar transport systems. *J Bacteriol* 152: 19-25.
35. Taylor FR, Parks LW (1978) Metabolic interconversion of free sterols and steryl esters in *Saccharomyces cerevisiae*. *J Bacteriol* 136: 531-537.
36. Keulers M, Satroutdinov AD, Suzuki T, Kuriyama H (1996) Synchronization affector of autonomous short-period-sustained oscillation of *Saccharomyces cerevisiae*. *Yeast* 12: 673-682.
37. Gancedo JM, Gancedo C (1973) Concentrations of intermediary metabolites in yeast. *Biochimie* 55: 205-211.

38. Banuelos M, Gancedo C (1978) In situ study of the glycolytic pathway in *Saccharomyces cerevisiae*. Arch Microbiol 117: 197-201.
39. Yeh LA, Lee KH, Kim KH (1980) Regulation of rat liver acetyl-CoA carboxylase. Regulation of phosphorylation and inactivation of acetyl-CoA carboxylase by the adenylate energy charge. J Biol Chem 255: 2308-2314.
40. Shiraishi F, Savageau MA (1992) The tricarboxylic acid cycle in *Dictyostelium discoideum*. I. Formulation of alternative kinetic representations. J Biol Chem 267: 22912-22918.
