# Supplementary material for: REPRESENTASI HAK PEREMPUAN DI TUJUH MEDIA CETAK JAWA TENGAH
Source: PLOS journal article supplement (doi:10.1371/journal.pone.0028344), 2010-10-01
Supplement: S10 (10.1371/journal.pone.0028344.s010) [file journal.pone.0028344.s010]

**Table S8 (cont...).**

|           | $V_{17}$ | $V_{18}$ | $V_{19}$ | $V_{20}$ | $V_{21}$ | $V_{22}$ | $V_{23}$ | $V_{24}$ | $V_{25}$ | $V_{26}$ | $V_{27}$ | $V_{28}$ | $V_{29}$ | $V_{30}$ | $V_{31}$ | $V_{32}$ |
|-----------|----------|----------|----------|----------|----------|----------|----------|----------|----------|----------|----------|----------|----------|----------|----------|----------|
| $X_{122}$ | -2.32    | ---      | ---      | 2.19     | 2.16     | 2.07     | ---      | ---      | ---      | 2.00     | 2.00     | 2.00     | 2.00     | 2.02     | 2.12     | 2.93     |
| $X_{123}$ | -1.36    | ---      | ---      | 1.29     | 1.27     | 1.22     | ---      | ---      | ---      | 1.17     | 1.17     | 1.17     | 1.17     | 1.19     | 1.24     | 1.72     |
| $X_{124}$ | -2.63    | 1.00     | ---      | 2.48     | 2.44     | 2.34     | ---      | ---      | ---      | 2.26     | 2.26     | 2.26     | 2.26     | 2.29     | 2.39     | 3.32     |
| $X_{128}$ | -1.72    | ---      | ---      | ---      | ---      | ---      | ---      | ---      | ---      | ---      | ---      | ---      | ---      | ---      | ---      | ---      |
| $X_{130}$ | ---      | ---      | ---      | 1.02     | ---      | ---      | ---      | ---      | ---      | ---      | ---      | ---      | ---      | ---      | ---      | ---      |
| $X_{132}$ | -3.44    | ---      | ---      | ---      | ---      | ---      | ---      | ---      | ---      | ---      | ---      | ---      | ---      | ---      | ---      | 1.25     |
| $X_{134}$ | -1.39    | ---      | ---      | ---      | ---      | ---      | ---      | ---      | ---      | ---      | ---      | ---      | ---      | ---      | ---      | ---      |
| $X_{144}$ | ---      | -1.04    | -1.65    | -1.45    | ---      | ---      | ---      | ---      | ---      | ---      | ---      | ---      | ---      | ---      | ---      | ---      |
| $X_{146}$ | ---      | 1.23     | 1.81     | 1.62     | ---      | ---      | ---      | ---      | ---      | ---      | ---      | ---      | ---      | ---      | ---      | ---      |
| $X_{148}$ | ---      | ---      | ---      | -1.04    | ---      | ---      | ---      | ---      | ---      | ---      | ---      | ---      | ---      | ---      | ---      | ---      |
| $X_{152}$ | 7.22     | -1.25    | ---      | -2.85    | -2.77    | -2.59    | ---      | ---      | ---      | -2.43    | -2.43    | -2.43    | -2.43    | -2.45    | -2.56    | -3.56    |
| $X_{157}$ | 3.47     | ---      | ---      | ---      | ---      | ---      | ---      | ---      | ---      | ---      | ---      | ---      | ---      | ---      | ---      | -1.26    |
| $X_{158}$ | ---      | ---      | ---      | 1.02     | ---      | ---      | ---      | ---      | ---      | ---      | ---      | ---      | ---      | ---      | ---      | ---      |
| $X_{159}$ | -2.29    | ---      | ---      | ---      | ---      | ---      | ---      | ---      | ---      | ---      | ---      | ---      | ---      | ---      | ---      | 1.13     |
| $X_{160}$ | -4.62    | ---      | ---      | ---      | ---      | ---      | ---      | ---      | ---      | ---      | ---      | ---      | ---      | ---      | ---      | ---      |
| $X_{165}$ | 3.61     | 1.02     | ---      | ---      | ---      | ---      | ---      | ---      | ---      | ---      | ---      | ---      | ---      | ---      | ---      | -1.31    |

**Table S8 (cont...).**

|           | $V_{33}$ | $V_{34}$ | $V_{35}$ | $V_{36}$ | $V_{37}$ | $V_{38}$ | $V_{39}$ | $V_{40}$ |
|-----------|----------|----------|----------|----------|----------|----------|----------|----------|
| $X_{122}$ | 2.51     | 2.98     | 5.98     | 4.31     | 4.56     | ---      | 4.01     | 8.63     |
| $X_{123}$ | 1.48     | 1.75     | 3.51     | 2.53     | 2.68     | ---      | 2.35     | 5.07     |
| $X_{124}$ | 2.84     | 3.38     | 6.76     | 4.88     | 5.16     | ---      | 4.54     | 9.77     |
| $X_{125}$ | ---      | ---      | 1.03     | ---      | ---      | ---      | ---      | 1.49     |
| $X_{130}$ | ---      | ---      | 1.64     | ---      | 1.12     | ---      | ---      | 2.38     |
| $X_{132}$ | 1.08     | 1.29     | 2.58     | 1.14     | ---      | ---      | 1.72     | 3.73     |
| $X_{148}$ | ---      | ---      | -1.67    | ---      | -1.13    | ---      | ---      | -2.41    |
| $X_{152}$ | -2.95    | -3.52    | -7.07    | -5.34    | -5.74    | ---      | -4.88    | -10.21   |
| $X_{157}$ | -1.09    | -1.30    | -2.60    | -1.15    | ---      | ---      | -1.73    | -3.76    |
| $X_{158}$ | ---      | ---      | 1.64     | ---      | 1.11     | ---      | ---      | 2.37     |
| $X_{159}$ | ---      | 1.12     | 2.24     | 1.69     | 1.82     | ---      | 1.55     | 3.24     |
| $X_{165}$ | -1.14    | -1.35    | -2.71    | -1.20    | ---      | ---      | -1.80    | -3.91    |
| $X_{174}$ | ---      | ---      | 1.08     | ---      | ---      | ---      | ---      | 1.56     |
| $X_{176}$ | -1.25    | ---      | ---      | ---      | ---      | ---      | ---      | ---      |
| $X_{177}$ | ---      | -1.48    | ---      | ---      | ---      | ---      | ---      | ---      |
| $X_{179}$ | ---      | ---      | -1.08    | ---      | ---      | ---      | ---      | -1.56    |
| $X_{180}$ | ---      | ---      | -1.30    | ---      | ---      | ---      | ---      | -2.60    |
| $X_{183}$ | ---      | ---      | 1.80     | ---      | ---      | ---      | ---      | 2.60     |
| $X_{186}$ | ---      | ---      | -2.75    | -1.96    | -2.06    | ---      | -1.85    | -3.97    |
