# Supplementary material for: REPRESENTASI HAK PEREMPUAN DI TUJUH MEDIA CETAK JAWA TENGAH
Source: PLOS journal article supplement (doi:10.1371/journal.pone.0028344), 2010-10-01
Supplement: S11 (10.1371/journal.pone.0028344.s011) [file journal.pone.0028344.s011]

**Table S9 (cont...).**

|               | $V_{17}$ | $V_{18}$ | $V_{19}$ | $V_{20}$ | $V_{21}$ | $V_{22}$ | $V_{23}$ | $V_{24}$ | $V_{25}$ | $V_{26}$ | $V_{27}$ | $V_{28}$ | $V_{29}$ | $V_{30}$ | $V_{31}$ | $V_{32}$ |
|---------------|----------|----------|----------|----------|----------|----------|----------|----------|----------|----------|----------|----------|----------|----------|----------|----------|
| $\alpha_1$    | 3.54     | 1.01     | ---      | ---      | ---      | ---      | ---      | ---      | ---      | ---      | ---      | ---      | ---      | ---      | ---      | -1.28    |
| $\alpha_2$    | 3.55     | 1.01     | ---      | ---      | ---      | ---      | ---      | ---      | ---      | ---      | ---      | ---      | ---      | ---      | ---      | -1.28    |
| $\alpha_3$    | ---      | 1.42     | ---      | 1.51     | 1.23     | ---      | ---      | ---      | ---      | ---      | ---      | ---      | ---      | ---      | ---      | ---      |
| $\alpha_5$    | 1.47     | ---      | ---      | ---      | ---      | ---      | ---      | ---      | ---      | ---      | ---      | ---      | ---      | ---      | ---      | ---      |
| $\alpha_6$    | 1.01     | ---      | ---      | ---      | ---      | ---      | ---      | ---      | ---      | ---      | ---      | ---      | ---      | ---      | ---      | ---      |
| $\alpha_8$    | ---      | 1.25     | ---      | 1.35     | 1.06     | ---      | ---      | ---      | ---      | ---      | ---      | ---      | ---      | ---      | ---      | ---      |
| $\alpha_{12}$ | ---      | 1.07     | ---      | 1.20     | ---      | ---      | ---      | ---      | ---      | ---      | ---      | ---      | ---      | ---      | ---      | ---      |
| $\alpha_{13}$ | 3.70     | 1.04     | ---      | ---      | ---      | ---      | ---      | ---      | ---      | ---      | ---      | ---      | ---      | ---      | ---      | -1.34    |
| $\alpha_{15}$ | ---      | 1.09     | 1.73     | 1.52     | ---      | 1.00     | ---      | ---      | ---      | ---      | ---      | ---      | ---      | ---      | ---      | ---      |
| $\alpha_{16}$ | ---      | 1.23     | 1.81     | 1.62     | ---      | ---      | ---      | ---      | ---      | ---      | ---      | ---      | ---      | ---      | ---      | ---      |
| $\alpha_{18}$ | ---      | 1.47     | 1.04     | ---      | 1.26     | ---      | ---      | ---      | ---      | ---      | ---      | ---      | ---      | ---      | ---      | ---      |
| $\alpha_{19}$ | ---      | ---      | 1.24     | ---      | ---      | ---      | ---      | ---      | ---      | ---      | ---      | ---      | ---      | ---      | ---      | ---      |
| $\alpha_{20}$ | ---      | ---      | ---      | 1.43     | ---      | ---      | ---      | ---      | ---      | ---      | ---      | ---      | ---      | ---      | ---      | ---      |
| $\alpha_{21}$ | ---      | ---      | ---      | ---      | 1.44     | ---      | ---      | ---      | ---      | ---      | ---      | ---      | ---      | ---      | ---      | ---      |
| $\alpha_{22}$ | ---      | ---      | ---      | ---      | ---      | 1.21     | ---      | ---      | ---      | ---      | ---      | ---      | ---      | ---      | ---      | ---      |
| $\alpha_{23}$ | -2.84    | ---      | ---      | 1.08     | 1.04     | ---      | ---      | ---      | ---      | ---      | ---      | ---      | ---      | ---      | ---      | 1.30     |
| $\alpha_{24}$ | -6.24    | ---      | ---      | 1.78     | 1.69     | 1.47     | ---      | ---      | ---      | 1.29     | 1.29     | 1.29     | 1.29     | 1.31     | 1.37     | 1.90     |
| $\alpha_{25}$ | -4.07    | 1.55     | 1.23     | 3.84     | 3.78     | 3.63     | ---      | ---      | 1.00     | 3.50     | 3.50     | 3.50     | 3.50     | 3.54     | 3.71     | 5.14     |
| $\alpha_{26}$ | ---      | ---      | ---      | ---      | ---      | ---      | ---      | ---      | ---      | ---      | ---      | ---      | ---      | ---      | ---      | 1.35     |
| $\alpha_{27}$ | ---      | ---      | ---      | ---      | ---      | ---      | ---      | ---      | ---      | ---      | ---      | ---      | ---      | ---      | ---      | 1.35     |
| $\alpha_{28}$ | ---      | ---      | ---      | ---      | ---      | ---      | ---      | ---      | ---      | ---      | ---      | ---      | ---      | ---      | ---      | 1.35     |
| $\alpha_{29}$ | ---      | ---      | ---      | ---      | ---      | ---      | ---      | ---      | ---      | ---      | ---      | ---      | ---      | ---      | ---      | 1.35     |
| $\alpha_{30}$ | ---      | ---      | ---      | 1.00     | ---      | ---      | ---      | ---      | ---      | ---      | ---      | ---      | ---      | ---      | 1.02     | 1.41     |
| $\alpha_{31}$ | ---      | ---      | ---      | 1.09     | 1.08     | 1.06     | ---      | ---      | ---      | ---      | ---      | ---      | ---      | ---      | 1.11     | 1.53     |
| $\alpha_{32}$ | ---      | ---      | ---      | 1.94     | 1.92     | 1.89     | ---      | ---      | ---      | ---      | ---      | ---      | ---      | ---      | ---      | 2.72     |
| $\alpha_{36}$ | ---      | ---      | ---      | 1.56     | 1.55     | 1.52     | ---      | ---      | ---      | ---      | ---      | ---      | ---      | ---      | ---      | 2.19     |
| $\alpha_{38}$ | ---      | ---      | ---      | ---      | ---      | ---      | ---      | ---      | ---      | ---      | ---      | ---      | ---      | ---      | ---      | 1.11     |
| $\alpha_{39}$ | -2.71    | 1.03     | ---      | 2.55     | 2.51     | 2.41     | ---      | ---      | ---      | 2.33     | 2.33     | 2.33     | 2.33     | 2.35     | 2.47     | 3.42     |

**Table S9 (cont...).**

|               | $V_{33}$ | $V_{34}$ | $V_{35}$ | $V_{36}$ | $V_{37}$ | $V_{38}$ | $V_{39}$ | $V_{40}$ |
|---------------|----------|----------|----------|----------|----------|----------|----------|----------|
| $\alpha_1$    | -1.10    | -1.31    | -2.62    | -1.16    | ---      | ---      | -1.76    | -3.79    |
| $\alpha_2$    | -1.10    | -1.31    | -2.63    | -1.17    | ---      | ---      | -1.77    | -3.80    |
| $\alpha_3$    | ---      | ---      | ---      | ---      | 1.49     | ---      | ---      | ---      |
| $\alpha_8$    | ---      | ---      | ---      | ---      | 1.32     | ---      | ---      | ---      |
| $\alpha_{12}$ | 1.03     | 1.06     | 1.93     | ---      | 1.31     | ---      | ---      | 2.79     |
| $\alpha_{13}$ | -1.16    | -1.38    | -2.77    | -1.23    | ---      | ---      | -1.84    | -4.00    |
| $\alpha_{23}$ | 1.10     | 1.30     | 2.62     | 1.97     | 2.13     | ---      | 1.78     | 3.78     |
| $\alpha_{24}$ | 1.63     | 1.94     | 3.88     | 2.97     | 3.31     | ---      | 2.60     | 5.60     |
| $\alpha_{25}$ | 4.41     | 5.23     | 10.48    | 7.56     | 8.00     | ---      | 7.03     | 15.13    |
| $\alpha_{26}$ | 1.16     | 1.37     | 2.75     | 1.96     | 2.06     | ---      | 1.85     | 3.97     |
| $\alpha_{27}$ | 1.16     | 1.37     | 2.75     | 1.96     | 2.06     | ---      | 1.85     | 3.97     |
| $\alpha_{28}$ | 1.16     | 1.37     | 2.75     | 1.96     | 2.06     | ---      | 1.85     | 3.97     |
| $\alpha_{29}$ | 1.16     | 1.37     | 2.75     | 1.96     | 2.06     | ---      | 1.85     | 3.97     |
| $\alpha_{30}$ | 1.20     | 1.43     | 2.87     | 2.05     | 2.15     | ---      | 1.93     | 4.14     |
| $\alpha_{31}$ | ---      | 1.56     | 3.12     | 2.23     | 2.33     | ---      | 2.09     | 4.50     |
| $\alpha_{32}$ | ---      | ---      | 5.54     | 3.95     | 4.14     | ---      | 3.72     | 8.00     |
| $\alpha_{33}$ | 1.05     | ---      | ---      | ---      | ---      | ---      | ---      | ---      |
| $\alpha_{34}$ | ---      | 1.19     | ---      | ---      | ---      | ---      | ---      | ---      |
| $\alpha_{35}$ | ---      | ---      | 4.68     | ---      | ---      | ---      | ---      | 6.75     |
| $\alpha_{36}$ | ---      | ---      | 4.46     | 6.34     | 5.53     | ---      | 5.03     | 6.44     |
| $\alpha_{37}$ | ---      | ---      | 2.27     | 2.95     | 3.26     | ---      | 2.57     | 3.27     |
| $\alpha_{38}$ | 2.93     | 3.48     | 6.97     | 5.02     | 5.32     | 1.00     | 4.67     | 10.06    |
| $\alpha_{39}$ | ---      | ---      | 4.46     | 4.76     | 4.43     | ---      | 5.01     | 6.44     |
| $\alpha_{40}$ | ---      | ---      | 2.34     | ---      | ---      | ---      | ---      | 4.38     |
