# Supplementary material for: REPRESENTASI HAK PEREMPUAN DI TUJUH MEDIA CETAK JAWA TENGAH
Source: PLOS journal article supplement (doi:10.1371/journal.pone.0028344), 2010-10-01
Supplement: S16 (10.1371/journal.pone.0028344.s016) [file journal.pone.0028344.s016]

**Equations S3.** *GMA mass balance equations for labelad pools.*

$$\begin{aligned}
 dL_1/dt &= l_{12,1} - l_{1,2} \\
 dL_2/dt &= (l_{1,2} + l_{3,2} + l_{4,2}) - (l_{2,3}^a + l_{2,4} + l_{2,5})^* \\
 dL_3/dt &= (l_{2,3}^c + l_{8,3} + l_{18,3} + l_{19,3}) - (l_{3,2} + l_{3,7} + l_{3,8}^a) \\
 dL_4/dt &= l_{2,4} - (l_{4,2} + l_{4,17}) \\
 dL_5/dt &= (l_{2,5} + l_{6,5} + l_{7,5}) - (l_{5,6} + l_{5,7}^a) \\
 dL_6/dt &= l_{5,6} - (l_{6,5} + l_{6,17}) \\
 dL_7/dt &= (l_{3,7} + l_{5,7}^c + l_{8,7} + l_{18,7} + l_{19,7}) - (l_{7,5} + l_{7,8}^a + l_{7,43}) \\
 dL_8/dt &= (l_{3,8}^c + l_{7,8}^c + l_{20,8}) - (l_{8,3} + l_{8,7} + l_{8,18} + l_{8,20}) \\
 dL_9/dt &= l_{11,9} - (l_{9,10} + l_{9,15}) \\
 dL_{10}/dt &= l_{9,10} - l_{10,56} \\
 dL_{11}/dt &= l_{12,11} - (l_{11,9} + l_{11,14}) \\
 dL_{12}/dt &= (l_{4,17} + l_{6,17} + l_{24,12}^c) - (l_{12,1} + l_{12,11} + l_{12,23}^a + l_{12,148}) \\
 dL_{14}/dt &= (l_{3,8}^b + l_{7,8}^b + l_{11,14} + l_{18,19}^b) - (l_{14,142} + l_{14,145}) \\
 dL_{15}/dt &= l_{9,15} - (l_{3,8}^b + l_{7,8}^b + l_{15,44} + l_{18,19}^b) \\
 dL_{17}/dt &= (l_{4,17} + l_{6,17}) - l_{14,145} \\
 dL_{18}/dt &= (l_{8,18} + l_{21,18}) - (l_{18,3} + l_{18,7} + l_{18,19}^a + l_{18,21}) \\
 dL_{19}/dt &= (l_{18,19}^c + l_{22,19}) - (l_{19,3} + l_{19,7} + l_{19,22}) \\
 dL_{20}/dt &= l_{8,20} - l_{20,8} \\
 dL_{21}/dt &= l_{18,21} - l_{21,18} \\
 dL_{22}/dt &= l_{19,22} - l_{22,19} \\
 dL_{23}/dt &= l_{12,23}^c - (l_{2,3}^b + l_{5,7}^b) \\
 dL_{24}/dt &= l_{25,24} - (l_{12,23}^b + l_{24,12}^a) \\
 dL_{25}/dt &= (l_{38,25} + l_{124,25}) - (l_{24,12}^b + l_{25,24}) \\
 dL_{26}/dt &= l_{25,26} - l_{26,27} \\
 dL_{27}/dt &= l_{26,27} - l_{27,28} \\
 dL_{28}/dt &= l_{27,28} - (l_{28,29} + l_{28,179}) \\
 dL_{29}/dt &= l_{28,29} - l_{29,30} \\
 dL_{30}/dt &= (l_{29,30} + l_{33,30}) - (l_{30,31} + l_{30,33}) \\
 dL_{31}/dt &= (l_{30,31} + l_{34,31}) - (l_{31,32} + l_{31,34}) \\
 dL_{32}/dt &= (l_{31,32} + l_{35,32} + l_{37,32} + l_{39,32}) - (l_{32,35} + l_{32,37} + l_{32,39} + l_{32,186}) \\
 dL_{33}/dt &= l_{30,33} - l_{33,30} \\
 dL_{34}/dt &= l_{31,34} - l_{34,31} \\
 dL_{35}/dt &= (l_{32,35} + l_{40,35}) - (l_{35,32} + l_{35,40}) \\
 dL_{36}/dt &= (l_{37,36} + l_{39,36}) - (l_{36,37}^a + l_{36,37}^b + l_{36,37}^c + l_{36,39})
 \end{aligned}$$

$$\begin{aligned}
dL_{37}/dt &= (l_{32,37} + l_{36,37}^a + l_{36,37}^b + l_{36,37}^c) - (l_{37,32} + l_{37,36}) \\
dL_{38}/dt &= l_{125,38} - l_{38,25} \\
dL_{39}/dt &= (l_{42,39} + l_{36,39} + l_{40,39}) - (l_{39,32} + l_{39,36}) \\
dL_{40}/dt &= l_{35,40} - (l_{40,35} + l_{40,39})
\end{aligned}$$

(\*) A superscript indicates deviations from the total pool; the method automatically computes equations for the labeled fractions.

### **Tracer method: Mathematical approach to modeling tracer dynamics**

To characterize the movement and distribution of a radioactive tracer throughout the sphingolipid pathway, simulations were performed using a method specifically developed for this purpose [1]. This method models the dynamics of total (labeled plus unlabeled) metabolites and in a second and third set of equations distributes material between labeled and unlabeled fractions (see [1] and main manuscript for details of the method).

### **Tracer equations**

In Equations S3 and S4, the labeled metabolites serine ( $L_{13}$ ) and inositol ( $L_{16}$ ) are not included because they never receive label in radioactive acetate ( $L_{125}$ ) experiments. For the same reason, the time independent variables palmitate ( $L_{158}$ ) and pyruvate ( $L_{124}$ ) are not included in Equations S3 and S4.

## **References.**

1. Voit EO, Alvarez-Vasquez F, Sims KJ (2004) Analysis of dynamic labeling data. Math Biosci 191: 83-99.
